# Supplementary material
Source: Springer Nature journal article supplement (https://www.springermedizin.de/resource/supplementary/13024_2012_358_MOESM1_ESM.pdf/9643822)
Supplement: MOESM1 [file 9643822]

# Supplementary Figure 1

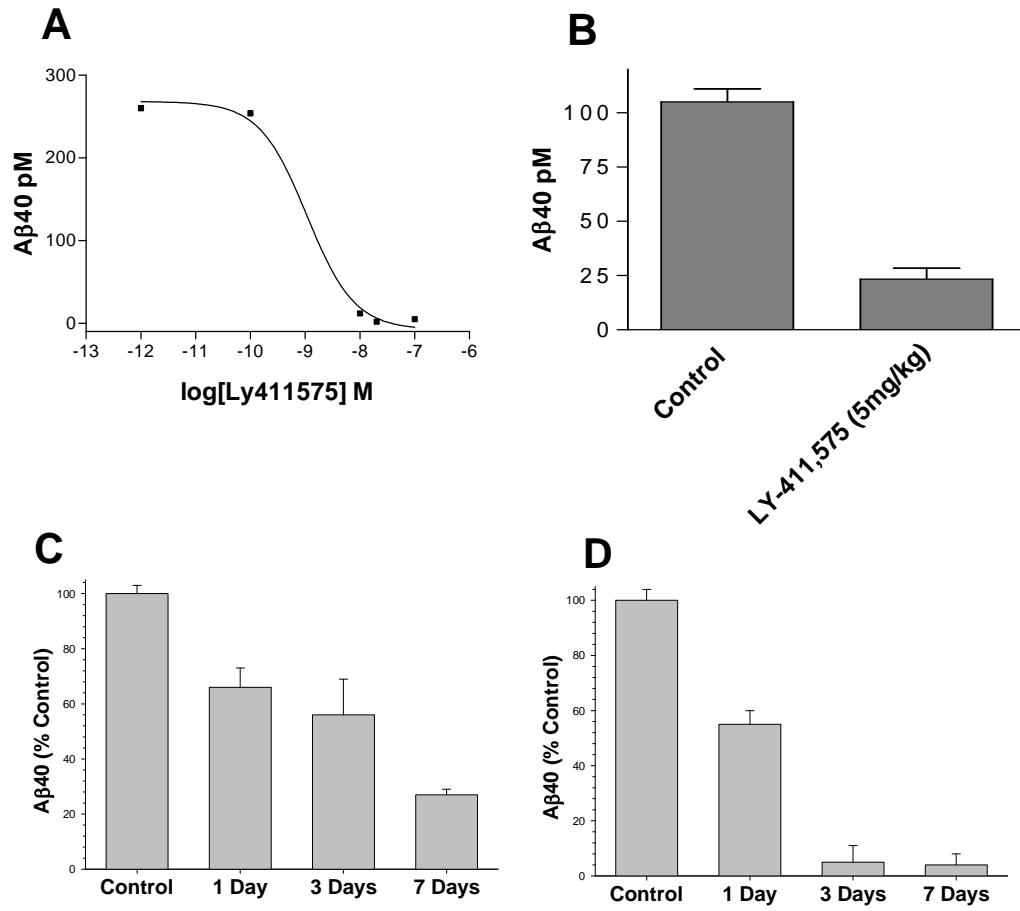

### **Supplementary Figure 1 Legend.**

**A.** Wild type APP overexpressing CHO cells were treated with indicated concentrations of LY-411,575 overnight. Conditioned media were then assayed for secreted A $\beta$ 40 by sandwich ELISA.

**B.** Acute LY-411,575 treatment reduces A $\beta$ 40 levels in brains of mice. Tg2576 mice (3 month old) were injected with LY-411,575 (5 mg/kg) intraperitoneally. Mice were sacrificed 6 hrs later and brain (2% SDS solubilized) A $\beta$ 40 levels were measured ELISA. ( $n=3$  mice/group)

**C, D.** Tg2576 mice were dosed orally (suspended in Kool-Aid) with LY-411,575 (10 mg/kg) for indicated times and brain (2% SDS solubilized) A $\beta$ 40 levels (**C**) and plasma A $\beta$ 40 levels (**D**) were measured by ELISA ( $n=3$  mice/group).
